# Supplementary material
Source: HighWire-hosted journal article supplement (https://openheart.bmj.com/content/6/1/e000986)
Supplement: inline-supplementary-material-1 [file inline-supplementary-material-1.docx]

# Supplementary

## Supplementary table 1 – baseline characteristica

|  | **Study population** |  | **Women** | **Men** | **p-value** |
| --- | --- | --- | --- | --- | --- |
| n (%) | 4605 |  | 1076 (23.4) | 3529 (76.6) |  |
| Median age/ years (IQR) | 63.7 (55.6-71.5) |  | 69.1 (61.0-76.0) | 62.2 (54.3-69.6) | <0.001 |
| **Cardiac risk factors n(%)** |  |  |  |  |  |
| Former or current smoker | 2965 (64.4) |  | 966 (63.3) | 1999 (64.9) | 0.28 |
| Diabetes | 792 (17.2) |  | 200 (18.6) | 592 (16.8) | 0.17 |
| Hypertension | 2960 (64.3) |  | 756 (70.3) | 2205 (62.5) | <0.001 |
| Hypercholesterolaemia | 2917 (63.3) |  | 685 (63.7) | 2233 (63.3) | 0.81 |
| Family history of CVD | 1649 (35) |  | 416 (38.7) | 1233 (34.9) | 0.08 |
| Renal disease | 265 (5.8) |  | 87 (8.1) | 178 (5.0) | <0.001 |
| Previous MI | 488 (10.6) |  | 90 (8.4) | 398 (11.3) | 0.007 |
| Previous PCI | 585 (12.7) |  | 101 (9.4) | 484 (13.7) | <0.001 |
| Previous CABG | 126 (2.7) |  | 15 (1.4) | 111 (3.1) | 0.002 |
| Previous revascularization | 662 (14.4) |  | 112 (10.4) | 550 (15.6) | <0.001 |
| Heart failure | 250 (5.4) |  | 80 (7.4) | 170 (4.8) | 0.001 |
| Stroke or TIA | 112 (2.4) |  | 27 (2.5) | 85 (2.4) | 0.85 |
| **Clinical presentation** |  |  |  |  |  |
| Stable | 1667 (36.2) |  | 407 (37.8) | 1261 (35.7) | 0.21 |
| Unstable | 1541 (33.5) |  | 346 (32.2) | 1195 (33.9) | 0.30 |
| Stemi | 1397 (30.3) |  | 323 (30.0) | 1074 (30.4) | 0.80 |
| **Comorbidities** |  |  |  |  |  |
| Aortic aneurism | 32 (0.7) |  | 2 (0.2) | 30 (0.9) | 0.018 |
| PAOD | 199 (4.3) |  | 41 (3.8) | 158 (4.5) | 0.35 |
| COPD | 283 (6.2) |  | 69 (6.4) | 214 (6.1) | 0.68 |
| Liver disease | 95 (2.1) |  | 13 (1.2) | 82 (2.3) | 0.024 |
| Rheumatologic disorder | 197 (4.3) |  | 80 (7.4) | 117 (3.3) | <0.001 |
| Peptic ulcer disease | 121 (2.6) |  | 32 (3.0) | 89 (2.5) | 0.42 |
| Cancer | 210 (4.6) |  | 64 (6.0) | 146 (4.1) | 0.49 |
| **Diseased vessels** |  |  |  |  |  |
| Diseased LM | 47 (1.0) |  | 7 (0.7) | 40 (1.1) | 0.17 |
| Diseased LAD | 2964 (64.4) |  | 675 (62.7) | 2289 (64.9) | 0.21 |
| Diseased LCX | 1652 (35.9) |  | 337 (31.3) | 1316 (37.3) | <0.001 |
| Diseased RCA | 2420 (52.6) |  | 573 (53.3) | 1847 (52.3) | 0.60 |
| **Complexity of coronary artery disease** | |  |  |  |  |
| Multivessel | 1867 (40.5) |  | 395 (36.7) | 1472 (41.7) | 0.004 |
| CTO | 194 (4.21) |  | 27 (2.5) | 167 (4.7) | 0.004 |

BMS = Bare-metal stent; CABG = Coronary artery bypass grafting; COPD = chronic obstructive pulmonary disease; CTO = chronic total occlusion; DES = Drug-eluting stent; IDDM = Insulin-dependent diabetes mellitus; IQR = Interquartile range; LAD = left anterior descending artery; LCX = left circumflex artery; LM = Left main artery; MI = myocardial infar ction; NIDDM = Non-insulin-dependent diabetes mellitus; PAOD = Peripheral arterial occlusive disease; PCI = percutaneous cardiac intervention; RCA = Right coronary artery; SD = standard deviation; TIA = transient ischemic attack.
